# Supplementary material for: Conformational changes of an oxovanadium complex probed by ENDOR spectroscopy and DFT calculations
Source: Royal Society of Chemistry journal article supplement (doi:10.1039/b204564h), 2002-01-01
Supplement: tables.doc [file tables.doc]

Corresponding Author*

Department of Chemistry

Cardiff University, PO BOX 912

Cardiff, CF10 3TB, UK

Tel : 029 20875850

e-mail : MurphyDM@cf.ac.uk

**Conformational changes of an oxovanadium complex probed by ENDOR spectroscopy and DFT calculations**

Damien M. Murphy*, Ian A. Fallis, Robert D. Farley, Richard Tucker,

Karen L. Avery and David J. Willock.

*Department of Chemistry, Cardiff University, PO Box 912, Cardiff CF10 3TB, UK*

_____________________________________________________________________

ELECTRONIC SUPPLIMENTARY

INFORMATION

_____________________________________________________________________

**Table Captions**

**Table S1;** Comparison of DFT and ENDOR V…H distances/angles for bis(acetylacetonato)oxovanadium(IV) in 2-picoline-d7/ toluene-d8 ~ *Cis* isomer. The DFT results have the protons from each methyl group placed consecutively.

**Table S2;** Comparison of DFT and ENDOR V…H distances/angles for bis(acetylacetonato)oxovanadium(IV) in 2-picoline-d7/ toluene-d8 ~ *Trans* isomer. The DFT results have the protons from each methyl group placed consecutively.

**Table S3**; Comparison of DFT and ENDOR V…H distances/angles for bis(acetylacetonato)oxovanadium(IV) in CD2Cl2 / toluene-d8. (x…) indicates the equivalent number of adducts.

**Table S4;** Comparison of DFT and ENDOR V…H distances/angles for bis(acetylacetonato)oxovanadium(IV) in pyridine-d5/ toluene-d8 ~ *Cis* isomer. The DFT results have the protons from each methyl group placed consecutively.

**Table S5;** Comparison of DFT and ENDOR V…H distances/angles for bis(acetylacetonato)oxovanadium(IV) in pyridine-d5/ toluene-d8 ~ *Trans* isomer. The DFT results have the protons from each methyl group placed consecutively.

**Table S1;**

| **Substituent** | **DFT Distance (R) /Å** | **DFT Angle (90>) / º** | ** dipolar coupling MHz** | **A iso MHz** | **Hyperfine Tensor**  **MHz** | | **ENDOR Distance (R) / Å** | **ENDOR**  **Angle () / º** |
| --- | --- | --- | --- | --- | --- | --- | --- | --- |
| **A** | A |
| aCH3 | 4.553 | 84.0 | 1.933 | 0.157 | -0.810 | 2.090 | 4.323 | 78.0 |
| aCH3 | 4.667 | 74.0 | …. | …. | …. | …. | …. | …. |
| aCH3 | 5.183 | 85.0 | …. | …. | …. | …. | …. | …. |
| aCH3 | 4.624 | 89.0 | …. | …. | …. | …. | …. | …. |
| aCH3 | 4.640 | 69.0 | …. | …. | …. | …. | …. | …. |
| aCH3 | 5.184 | 79.0 | …. | …. | …. | …. | …. | …. |
| aCH3 | 4.616 | 88.0 | …. | …. | …. | …. | …. | …. |
| aCH3 | 4.682 | 86.0 | …. | …. | …. | …. | …. | …. |
| aCH3 | 5.261 | 73.0 | …. | …. | …. | …. | …. | …. |
| aCH3 | 4.793 | 20.0 | …. | …. | …. | …. | …. | …. |
| aCH3 | 4.850 | 6.0 | …. | …. | …. | …. | …. | …. |
| aCH3 | 5.366 | 23.0 | 1.120 | -0.120 | -0.680 | 1.000 | 5.159 | 19.0 |
| bCH | 4.622 | 47.0 | 1.513 | -0.013 | -0.770 | 1.500 | 4.676 | 42.0 |
| bCH | 4.479 | 81.0 | 1.620 | -0.040 | -0.850 | 1.580 | 4.586 | 86.0 |

a = Coupling to protons of the methyl (CH3) groups.

b = Coupling to protons of the CH groups.

| **Table S2;**  **Substituent** | **DFT Distance (R) /Å** | **DFT Angle (90>) / º** | ** dipolar coupling MHz** | **A iso MHz** | **Hyperfine Tensor**  **MHz** | | **ENDOR Distance (R) / Å** | **ENDOR**  **Angle () / º** |
| --- | --- | --- | --- | --- | --- | --- | --- | --- |
| **A** | **A** |
| aCH3 | 4.592 | 65.4 | …. | …. | …. | …. | …. | …. |
| aCH3 | 4.685 | 86.8 | 1.527 | 0.013 | -0.750 | 1.540 | 4.678 | 82.0 |
| aCH3 | 5.191 | 72.9 | 1.277 | -0.177 | -0.815 | 1.100 | 4.961 | 68.0 |
| aCH3 | 4.619 | 86.9 | …. | …. | …. | …. | …. | …. |
| aCH3 | 4.656 | 72.0 | 1.457 | -0.097 | -0.825 | 1.360 | 4.750 | 77.0 |
| aCH3 | 5.193 | 78.2 | …. | …. | …. | …. | …. | …. |
| aCH3 | 4.660 | 89.0 | …. | …. | …. | …. | …. | …. |
| aCH3 | 4.616 | 78.0 | 1.440 | 0.030 | -0.690 | 1.470 | 4.769 | 79.0 |
| aCH3 | 5.194 | 76.0 | …. | …. | …. | …. | …. | …. |
| aCH3 | 4.631 | 89.0 | …. | …. | …. | …. | …. | …. |
| aCH3 | 4.648 | 67.4 | …. | …. | …. | …. | …. | …. |
| aCH3 | 5.192 | 76.0 | …. | …. | …. | …. | …. | …. |
| bCH | 4.481 | 75.0 | 1.727 | -0.227 | -1.090 | 1.500 | 4.487 | 70.0 |
| bCH | 4.483 | 75.0 | 1.800 | -3.800 | -1.280 | 1.420 | 4.425 | 71.0 |
| H2O | …. | …. | 6.133 | -0.133 | -3.200 | 6.000 | 2.926 | 10.0 |
| H2O Dist | …. | …. | 1.453 | 0.147 | -0.580 | 1.600 | 4.727 | 0.0 |

a = Coupling to protons of the methyl (CH3) groups.

b = Coupling to protons of the CH groups.

**Table S3;**

| **Substituent** | **DFT Distance (R) /Å** | **DFT Angle (90>) / º** | ** dipolar coupling MHz** | **A iso MHz** | **Hyperfine Tensor**  **MHz** | | **ENDOR Distance (R) / Å** | **ENDOR**  **Angle () / º** |
| --- | --- | --- | --- | --- | --- | --- | --- | --- |
| **A** | **A** |
| aCH3 | 4.600 (4) | 86.2(4) | 1.933 | 0.157 | -0.810 | 2.090 | 4.321 | 78.0 |
| aCH3 | 4.610 (4) | 65.0(4) | 1.628 | -0.040 | -0.850 | 1.580 | 4.584 | 86.0 |
| aCH3 | …. | …. | 1.527 | 0.013 | -0.750 | 1.540 | 4.675 | 82.0 |
| aCH3 | …. | …. | 1.457 | -0.097 | -0.825 | 1.360 | 4.748 | 77.0 |
| aCH3 | …. | …. | 1.440 | 0.030 | -0.690 | 1.470 | 4.767 | 79.0 |
| aCH3 | 5.180 (4) | 71.6(4) | 1.183 | -0.223 | -0.815 | 0.960 | 5.087 | 68.0 |
| bCH | …. | …. | 1.780 | -0.200 | -1.909 | 1.580 | 4.440 | 70.0 |
| bCH | 4.490 (2) | 70.6 | 1.820 | -0.400 | -1.310 | 1.420 | 4.407 | 71.0 |
| H2O | …. | …. | 6.067 | -0.067 | -3.100 | 6.000 | 2.928 | 10.0 |
| H2O Dist | …. | …. | 1.187 | -0.007 | -0.600 | 1.187 | 5.061 | 0.0 |

a = Coupling to protons of the methyl (CH3) groups.

b = Coupling to protons of the CH groups.

| **Table S4;**  **Substituent** | **DFT Distance (R) /Å** | **DFT Angle (90>) / º** | ** dipolar coupling MHz** | **A iso MHz** | **Hyperfine Tensor**  **MHz** | | **ENDOR Distance (R) / Å** | **ENDOR**  **Angle () / º** |
| --- | --- | --- | --- | --- | --- | --- | --- | --- |
| **A** | **A** |
| aCH3 | 4.594 | 83.0 | 1.753 | 0.127 | -0.750 | 1.880 | 4.443 | 16.0 |
| aCH3 | 4.650 | 74.9 | 1.413 | 0.027 | -0.680 | 1.440 | 4.800 | 88.0 |
| aCH3 | 5.166 | 86.4 | 1.187 | -0.013 | -0.680 | 1.100 | 5.061 | 19.0 |
| aCH3 | 4.538 | 79.6 | …. | …. | …. | …. | …. | …. |
| aCH3 | 4.696 | 78.4 | …. | …. | …. | …. | …. | …. |
| aCH3 | 5.162 | 89.7 | …. | …. | …. | …. | …. | …. |
| aCH3 | 4.573 | 87.5 | …. | …. | …. | …. | …. | …. |
| aCH3 | 4.662 | 83.3 | …. | …. | …. | …. | …. | …. |
| aCH3 | 5.233 | 69.3 | …. | …. | …. | …. | …. | …. |
| aCH3 | 4.816 | 15.4 | …. | …. | …. | …. | …. | …. |
| aCH3 | 4.862 | 5.8 | …. | …. | …. | …. | …. | …. |
| aCH3 | 5.373 | 18.1 | …. | …. | …. |  | …. | …. |
| bCH | 4.606 | 42.8 | 1.513 | -0.013 | -0.770 | 1.500 | 4.676 | 42.0 |
| bCH | 4.438 | 89.6 | 1.900 | -0.450 | -1.400 | 1.450 | 4.349 | 86.0 |
| H2O | …. | …. | 4.333 | -1.033 | -3.200 | 3.300 | 3.287 | 22.0 |
| H2O a = Coupling to protons of the methyl (CH3) groups.  b = Coupling to protons of the CH groups. | …. | …. | 2.300 | -0.100 | -1.250 | 2.200 | 4.078 | 71.0 |

**Table S5;**

| **Substituent** | **DFT Distance (R) /Å** | **DFT Angle (90>) / º** | ** dipolar coupling MHz** | **A iso MHz** | **Hyperfine Tensor**  **MHz** | | **ENDOR Distance (R) / Å** | **ENDOR**  **Angle () / º** |
| --- | --- | --- | --- | --- | --- | --- | --- | --- |
| **A** | **A** |
| aCH3 | 4.629 | 67.0 | 1.887 | -0.317 | -1.260 | 1.570 | 4.355 | 66.0 |
| aCH3 | 4.659 | 88.7 | 1.853 | -0.343 | -0.343 | 1.510 | 4.381 | 67.0 |
| aCH3 | 5.190 | 76.1 | 1.660 | 0.030 | -0.800 | 1.690 | 4.547 | 75.0 |
| aCH3 | 4.618 | 72.4 | …. | …. | …. | …. | …. | …. |
| aCH3 | 4.638 | 86.7 | …. | …. | …. | …. | …. | …. |
| aCH3 | 5.189 | 78.1 | …. | …. | …. | …. | …. | …. |
| aCH3 | 4.640 | 87.9 | …. | …. | …. | …. | …. | …. |
| aCH3 | 4.647 | 71.0 | …. | …. | …. | …. | …. | …. |
| aCH3 | 5.193 | 77.5 | …. | …. | …. | …. | …. | …. |
| aCH3 | 4.581 | 66.9 | …. | …. | …. | …. | …. | …. |
| aCH3 | 4.685 | 87.9 | …. | …. | …. | …. | …. | …. |
| aCH3 | 5.186 | 72.9 | …. | …. | …. | …. | …. | …. |
| bCH | 4.474 | 74.8 | 1.987 | -0.407 | -1.400 | 1.580 | 4.280 | 65.0 |
| bCH | 4.471 | 76.9 | 2.027 | -0.537 | -1.550 | 1.490 | 4.256 | 86.0 |

a = Coupling to protons of the methyl (CH3) groups.

b = Coupling to protons of the CH groups.
